# Supplementary material for: Obtaining superior high-density fused-ring energetic materials via the introduction of carbonyl, o-NH2–NO2 and nitroamino groups
Source: Royal Society of Chemistry journal article supplement (doi:10.1039/d3dt04237e), 2024-01-01
Supplement: d3dt04237e1.pdf [file d3dt04237e1.pdf]

## Supporting Information

### Obtaining excellent density fused-ring energetic materials via combination carbonyl, *o*-NH<sub>2</sub>-NO<sub>2</sub> and nitroamino groups

Xiaoyu Guo<sup>#,a</sup>, Yizhen Feng<sup>#,a</sup>, Shengjie Zhi<sup>a</sup>, Yajie Fu<sup>a</sup>, Yingle Liu<sup>a,c,\*</sup>, Qiangqiang Liu<sup>a</sup>, Haixiang Gao<sup>b,\*</sup>

<sup>a</sup>School of Chemistry and Environmental Engineering, Sichuan University of Science & Engineering, 180 Xueyuan Street, Huixing Lu, Zigong, Sichuan 643000, China.

<sup>b</sup>Department of Applied Chemistry, China Agricultural University, Beijing 100193, China.

<sup>c</sup>Beijing Institute of Technology Chongqing Innovation Center, Chongqing 401120, China.

<sup>#</sup> These authors contributed equally to this work.

\* Corresponding authors. Email addresses: liuyingleyou@163.com (Y. Liu), liuqq87@163.com (Q. Liu), hxgao@cau.edu.cn (H. Gao)

#### Table of Contents

|                                                                                                                           |     |
|---------------------------------------------------------------------------------------------------------------------------|-----|
| 1. General Methods.....                                                                                                   | S2  |
| 2. Theoretical Calculations.....                                                                                          | S2  |
| 3. Experimental Section .....                                                                                             | S3  |
| 4. X-ray Crystallography of <b>4</b> •H <sub>2</sub> O, <b>7</b> •H <sub>2</sub> O and <b>9</b> •H <sub>2</sub> O .....   | S5  |
| 5. 2D fingerprint plots for <b>4</b> , <b>7</b> and <b>9</b> .....                                                        | S9  |
| 6. <sup>1</sup> H NMR and <sup>13</sup> C NMR of new compounds <b>3</b> , <b>4</b> , <b>6</b> , <b>7</b> , <b>9</b> ..... | S11 |
| 7. DSC of new compounds <b>4</b> , <b>7</b> and <b>9</b> .....                                                            | S14 |
| 8. References.....                                                                                                        | S19 |

## 1. General Methods

Density was determined at room temperature by employing a Micromeritics AccuPyc II 1340 gas pycnometer. Decomposition temperatures (onset) were recorded using a dry nitrogen gas purge and a heating rate of 5 °C min<sup>-1</sup> on a differential scanning calorimeter (DSC, TA Instruments Q2000). Elemental analyses (C, H, N) were performed with a Vario Micro cube Elementar Analyzer. Impact sensitivity measurements were made using a standard BAM Fallhammer equipment (HWP18-30S) purchasing from Young Instruments with the error ranges ± 1mm, and Friction sensitivity measurements were made using a standard BAM Fallhammer equipment (HWP17-10S) purchasing from Young Instruments with the error ranges ± 0.49 N in the test of 40 N.

## 2. Theoretical Calculations

The gas phase enthalpies of formation were calculated based on isodesmic reactions (Scheme S1, ESI†). The enthalpy of reaction was obtained by combining the MP2/6-311++G\*\* energy difference for the reactions, the scaled zero point energies (ZPE), values of thermal correction (HT), and other thermal factors. The solid state heats of formation of **5**, **7**, and **8** were calculated with Trouton's rule according to eqn (1) (*T* represents either the melting point or the decomposition temperature when no melting occurs prior to decomposition).<sup>1</sup>

$$\Delta H_{\text{sub}} = 188/\text{J mol}^{-1} \text{K}^{-1} \times T \quad (1)$$

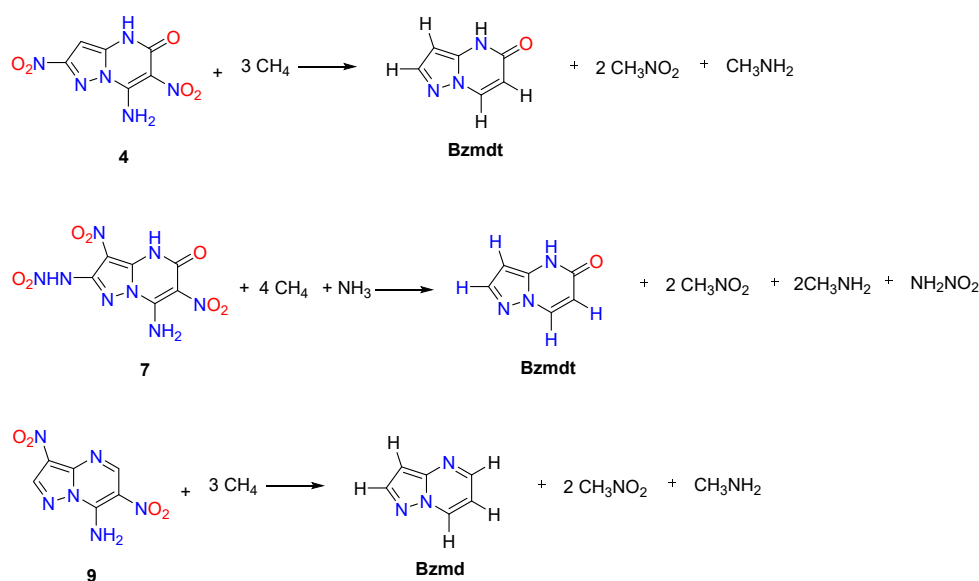

**Scheme S1.** Isodesmic reactions

**Table S1.** Calculated zero point energy (*ZPE*), values of the correction (*Hr*), total energy (*E0*) and heats of formation (*HOF*)

| Species  | <i>ZPE</i> <sup>[a]</sup> | <i>Hr</i> <sup>[a]</sup> | <i>E0</i> <sup>[b]</sup> | corrected <i>E0</i> <sup>[b]</sup> | <i>HOF</i> (kJ mol <sup>-1</sup> ) <sup>[b]</sup> |
|----------|---------------------------|--------------------------|--------------------------|------------------------------------|---------------------------------------------------|
| <b>4</b> | 0.133171                  | 0.147732                 | -933.3945656             | -933.2521604                       | -32.00191095                                      |
| <b>7</b> | 0.15074                   | 0.168914                 | -1192.697706             | -1192.534822                       | 53.60901834                                       |

|                                 |          |          |              |              |              |
|---------------------------------|----------|----------|--------------|--------------|--------------|
| <b>9</b>                        | 0.15074  | 0.106898 | -909.5873962 | -909.4842636 | -140.9158998 |
| Bzmdt                           | 0.110224 | 0.118201 | -469.9499957 | -469.8362037 | 114.9189707  |
| Bzmd <sup>2</sup>               | 0.105716 | 0.112431 | -394.8529222 | -394.7447198 | 325.39       |
| CH <sub>4</sub>                 | 0.044793 | 0.048605 | -40.3796224  | -40.33281    | -74.6        |
| NH <sub>3</sub>                 | 0.034384 | 0.038203 | -56.4154647  | -56.37864    | -45.9        |
| CH <sub>3</sub> NH <sub>2</sub> | 0.06403  | 0.06840  | -95.59384    | -95.52800    | -23.0        |
| NH <sub>2</sub> NO <sub>2</sub> | 0.039257 | 0.043903 | -260.4931748 | -260.45084   | -6.11        |

[a] Data obtained from G2. [b] Data are from Ref. [D. R. Lide, ed., CRC Handbook of Chemistry and Physics, 88th Edition (Internet Version 2008), CRC Press/Taylor and Francis, Boca Rotan, Florida].

## 2. Experimental Section

### 3.1. Safety Precaution!

Although no explosions were observed during the syntheses and handling of these compounds in this study, all manipulations should be carried out in a hood and behind a safety shield. Actions involving scratching or scraping should be avoided. Eye protection and leather gloves should be worn. All of the energetic compounds should be synthesized on a small scale.

### 3.2. Sample preparation

#### *7-amino-5-oxo-4,5-dihydropyrazolo[1,5-a]pyrimidine-3-carbonitrile (3)*

2 mL of ethyl cyanoacetate, compound **1** (10 mmol, 1.08 g) and triethylamine (20 mmol, 2.02 g) were successively added into a reaction tube with stirring. After sealing the tube, the reaction temperature was raised to 150 °C and held for 8 hours. Then the solution was cooled to room temperature and 10 mL of water was poured into the tube. The yellow precipitate was collected by filtration and washed with Et<sub>2</sub>O (15 mL) and water (15 mL). **3** (1.43 g, 82%) was obtained as a yellow solid. <sup>1</sup>H NMR (600 MHz, DMSO) δ 12.07 (s, 1H), 8.38 (s, 1H), 7.73 (s, 2H), 5.31 (s, 1H) ppm. <sup>13</sup>C NMR (151 MHz, DMSO) δ 164.14, 150.31, 148.35, 145.58, 114.23, 77.49, 75.39 ppm. IR (KBr):  $\tilde{\nu}$  3315, 3128, 2930, 1655, 1432, 1414, 1252, 1108, 689 cm<sup>-1</sup>. Elemental analysis for C<sub>7</sub>H<sub>5</sub>N<sub>5</sub>O<sub>1</sub> (175.1): Calcd C 48.00, H 2.88, N 39.99 %. Found: C 47.78, H 2.95, N 39.02 %.

#### *7-amino-3,6-dinitropyrazolo[1,5-a]pyrimidin-5(4H)-one (4)*

To a mixture of 9 mL conc. H<sub>2</sub>SO<sub>4</sub> and 3 mL fuming HNO<sub>3</sub> at -5 °C, compound **3** (10 mmol, 1.75 g) was slowly added in small portions with continuous stirring. The temperature was allowed to warm slowly to 65 °C and held for 4 hours. Then the solution was poured into ice with stirring. The formed solid was filtered and washed with small amount of water to obtain compound **4** in 85% yield. <sup>1</sup>H NMR (600 MHz, DMSO) δ 9.63 (s, 1H), 9.54 (s, 1H), 8.78 (s, 1H) ppm. <sup>13</sup>C NMR (151 MHz, DMSO) δ 154.23, 149.16, 140.98, 138.71, 118.91, 111.59 ppm. IR (KBr):  $\tilde{\nu}$  3312, 2887,

1675, 1443, 1399, 1274, 1165, 758  $\text{cm}^{-1}$ . Elemental analysis for  $\text{C}_6\text{H}_4\text{N}_6\text{O}_5$  (240.1): Calcd C 30.01, H 1.68, N 35.00 %. Found: C 30.14, H 1.83, N 35.82 %.

*2,7-diamino-3-nitropyrzolo[1,5-a]pyrimidin-5(4H)-one (6)*

2 mL of ethyl cyanoacetate, compound **5** (10 mmol, 1.43 g) and triethylamine (20 mmol, 2.02 g) were successively added into a reaction tube with stirring. After sealing the tube, the reaction temperature was raised to 150 °C and held for 8 hours. Then the solution was cooled to room temperature and 10 mL of water was poured into the tube. The yellow precipitate was collected by filtration and washed with  $\text{Et}_2\text{O}$  (15 mL) and water (15 mL). **6** (1.68 g, 80%) was obtained as a green solid.  $^1\text{H}$  NMR (600 MHz, DMSO)  $\delta$  11.64 (s, 1H), 7.41 (s, 2H), 6.66 (s, 2H), 5.34 (s, 1H) ppm.  $^{13}\text{C}$  NMR (151 MHz, DMSO)  $\delta$  153.37, 149.53, 142.71, 108.59, 100.00, 78.69 ppm. IR (KBr):  $\tilde{\nu}$  3302, 3108, 2920, 1643, 1433, 1420, 1277, 1118, 758  $\text{cm}^{-1}$ . Elemental analysis for  $\text{C}_6\text{H}_6\text{N}_6\text{O}_3$  (210.1): Calcd C 34.29, H 2.88, N 39.99 %. Found: C 34.48, H 2.95, N 39.02 %.

*N-(7-amino-3,6-dinitro-5-oxo-4,5-dihydropyrzolo[1,5-a]pyrimidin-2-yl)nitramide (7)*

To a mixture of 9 mL conc.  $\text{H}_2\text{SO}_4$  and 3 mL fuming  $\text{HNO}_3$  at -5 °C, compound **6** (10 mmol, 2.10 g) was slowly added in small portions with continuous stirring. The temperature was allowed to warm slowly to 65 °C and held for 4 hours. Then the solution was poured into ice with stirring. The formed solid was filtered and washed with small amount of water to obtain compound **7** in 78% yield.  $^1\text{H}$  NMR (600 MHz, DMSO)  $\delta$  9.60 (s, 2H), 5.41 (s, 2H) ppm.  $^{13}\text{C}$  NMR (151 MHz, DMSO)  $\delta$  154.09, 148.98, 142.89, 140.27, 112.56, 112.21 ppm. IR (KBr):  $\tilde{\nu}$  3408, 2950, 2843, 1655, 1448, 1404, 1298, 1113, 1016  $\text{cm}^{-1}$ . Elemental analysis for  $\text{C}_6\text{H}_4\text{N}_8\text{O}_7$  (300.1): Calcd C 24.01, H 1.34, N 37.33 %. Found: C 24.12, H 1.55, N 38.01 %.

*3,6-dinitropyrzolo[1,5-a]pyrimidin-7-amine (8)*

To a suspension of **1** (1.08 g, 5.0 mmol) in EtOH (20 mL) was added 3,3-diethoxy propionitrile (0.86 g, 6.0 mmol) and concentrated hydrochloric acid (0.6 mL). The reaction mixture was heated to reflux for 2 h. Then the precipitate was collected by filtration and washed with EtOH (12 mL) and water (12 mL). **8** (1.54 g, 97 %) was obtained as a white solid. The data of  $^1\text{H}$  NMR is the same as the literature.<sup>3</sup>

*3,6-dinitropyrzolo[1,5-a]pyrimidin-7-amine (9)*

To a mixture of 9 mL conc.  $\text{H}_2\text{SO}_4$  and 3 mL fuming  $\text{HNO}_3$  at -5 °C, compound **8** (10 mmol, 1.59 g) was slowly added in small portions with continuous stirring. The temperature was allowed to warm slowly to 65 °C and held for 4 hours. Then the solution was poured into ice with stirring.

The formed solid was filtered and washed with small amount of water to obtain compound **9** in 72% yield. <sup>1</sup>H NMR (600 MHz, DMSO-*d*<sub>6</sub>): δ = 10.08 (s, 1H), 9.74 (s, 1H), 9.29 (s, 1H), 9.09 (s, 1H) ppm. <sup>13</sup>C NMR (151 MHz, DMSO-*d*<sub>6</sub>): δ 152.44, 146.11, 144.29, 143.81, 124.22, 120.17 ppm. IR (KBr):  $\tilde{\nu}$  3396, 3267, 1643, 1589, 1469, 1272, 813, 617 cm<sup>-1</sup>. Elemental analysis for C<sub>6</sub>H<sub>4</sub>N<sub>6</sub>O<sub>4</sub> (224.1): Calcd C 32.15, H 1.80, N 37.50 %. Found: C 32.17, H 1.59, N 36.98 %.

### 3. X-ray Crystallography of **4**•H<sub>2</sub>O, **7**•H<sub>2</sub>O, and **9**•H<sub>2</sub>O

**Table S2.** Crystallographic data for **4**•H<sub>2</sub>O, **7**•H<sub>2</sub>O, and **9**•H<sub>2</sub>O

| Chemical formula                       | <b>4</b> •H <sub>2</sub> O                                 | <b>7</b> •H <sub>2</sub> O                                  | <b>9</b> •H <sub>2</sub> O                                  |
|----------------------------------------|------------------------------------------------------------|-------------------------------------------------------------|-------------------------------------------------------------|
| CCDC number                            | 2306222                                                    | 2306224                                                     | 2306223                                                     |
| Formula mass                           | 258.17                                                     | 318.19                                                      | 242.17                                                      |
| Crystal system                         | monoclinic                                                 | monoclinic                                                  | monoclinic                                                  |
| <i>a</i> /Å                            | 9.1700(2)                                                  | 6.7948(4)                                                   | 6.2158(4)                                                   |
| <i>b</i> /Å                            | 6.5296(2)                                                  | 9.4387(5)                                                   | 17.8398(10)                                                 |
| <i>c</i> /Å                            | 15.4974(4)                                                 | 16.5829(12)                                                 | 16.5515(10)                                                 |
| $\alpha$ /°                            | 90                                                         | 90                                                          | 90                                                          |
| $\beta$ /°                             | 97.747(2)                                                  | 92.635(6)                                                   | 97.761(6)                                                   |
| $\gamma$ /°                            | 90                                                         | 90                                                          | 90                                                          |
| Volume/Å <sup>3</sup>                  | 919.46(4)                                                  | 1062.40(11)                                                 | 1819.35(19)                                                 |
| Temperature/K                          | 170.00(10)                                                 | 100.00(10)                                                  | 169.99(10)                                                  |
| Space group                            | <i>P</i> 2 <sub>1</sub> / <i>n</i>                         | <i>P</i> 2 <sub>1</sub> / <i>n</i>                          | <i>P</i> 2 <sub>1</sub> / <i>n</i>                          |
| <i>Z</i>                               | 4                                                          | 4                                                           | 8                                                           |
| Radiation type                         | Cu K $\alpha$ ( $\lambda$ = 1.54184)                       | Cu K $\alpha$ ( $\lambda$ = 1.54184)                        | MoK $\alpha$ ( $\lambda$ = 0.71073)                         |
| $\mu$ /mm <sup>-1</sup>                | 1.481                                                      | 1.641                                                       | 0.155                                                       |
| Density calcd/g cm <sup>-3</sup>       | 1.865                                                      | 1.989                                                       | 1.768                                                       |
| F(000)                                 | 528.0                                                      | 648.0                                                       | 992.0                                                       |
| 2 $\Theta$ range for data collection/° | 10.624 to 146.092                                          | 10.682 to 142.808                                           | 4.566 to 49.998                                             |
| Index ranges                           | -11 ≤ <i>h</i> ≤ 7, -7 ≤ <i>k</i> ≤ 7, -18 ≤ <i>l</i> ≤ 17 | -5 ≤ <i>h</i> ≤ 8, -11 ≤ <i>k</i> ≤ 11, -16 ≤ <i>l</i> ≤ 20 | -6 ≤ <i>h</i> ≤ 7, -21 ≤ <i>k</i> ≤ 20, -15 ≤ <i>l</i> ≤ 19 |

|                               |                                                                     |                                                                     |                                                                     |
|-------------------------------|---------------------------------------------------------------------|---------------------------------------------------------------------|---------------------------------------------------------------------|
| Reflections collected         | 3074                                                                | 4736                                                                | 8087                                                                |
| Independent reflections       | 1769 [ $R_{\text{int}} = 0.0208$ ,<br>$R_{\text{sigma}} = 0.0234$ ] | 2027 [ $R_{\text{int}} = 0.0359$ ,<br>$R_{\text{sigma}} = 0.0471$ ] | 3207 [ $R_{\text{int}} = 0.0213$ ,<br>$R_{\text{sigma}} = 0.0327$ ] |
| Data/restraints/parameters    | 1769/0/175                                                          | 2027/0/206                                                          | 3207/0/324                                                          |
| R1 / wR2 [all data]           | 0.0383/0.0952                                                       | 0.0535/ 0.1141                                                      | 0.0509/ 0.1000                                                      |
| R1 / wR2 [ $I > 2\sigma(I)$ ] | 0.0351/0.0921                                                       | 0.0437/ 0.1091                                                      | 0.0401/0.0929                                                       |
| Goodness-of-fit on $F^2$      | 1.042                                                               | 1.047                                                               | 1.034                                                               |

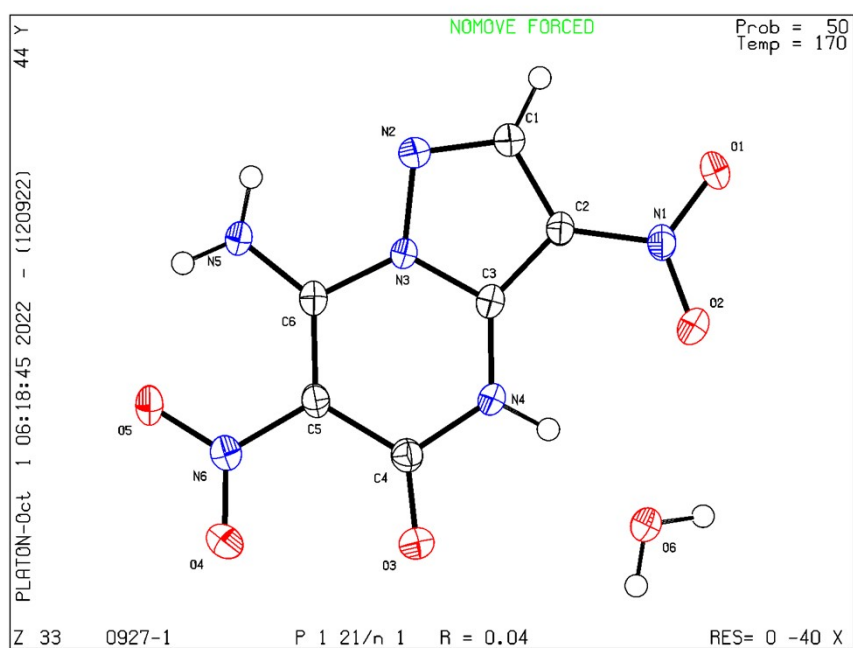

**Figure S1.** Single crystal of 4.H<sub>2</sub>O was obtained by slow evaporation of a solution of ethyl acetate for X-ray diffraction measurements.

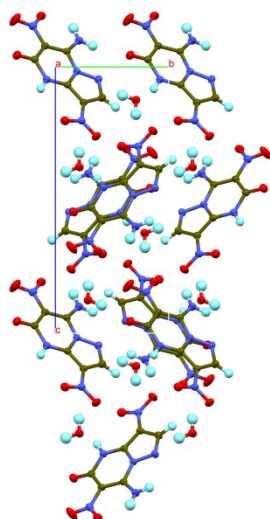

**Figure S2.** Unit cell view for **4.H<sub>2</sub>O** along a axis.

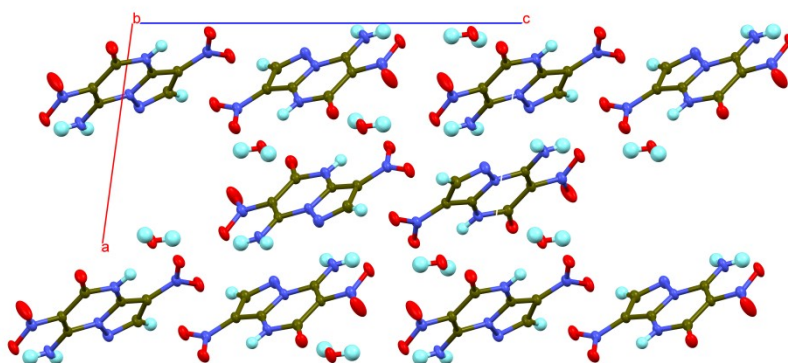

**Figure S3.** Unit cell view for **4.H<sub>2</sub>O** along b axis.

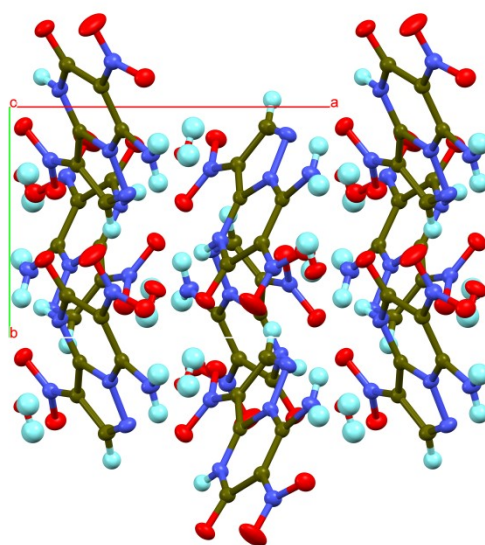

**Figure S4.** Unit cell view for **4.H<sub>2</sub>O** along c axis.

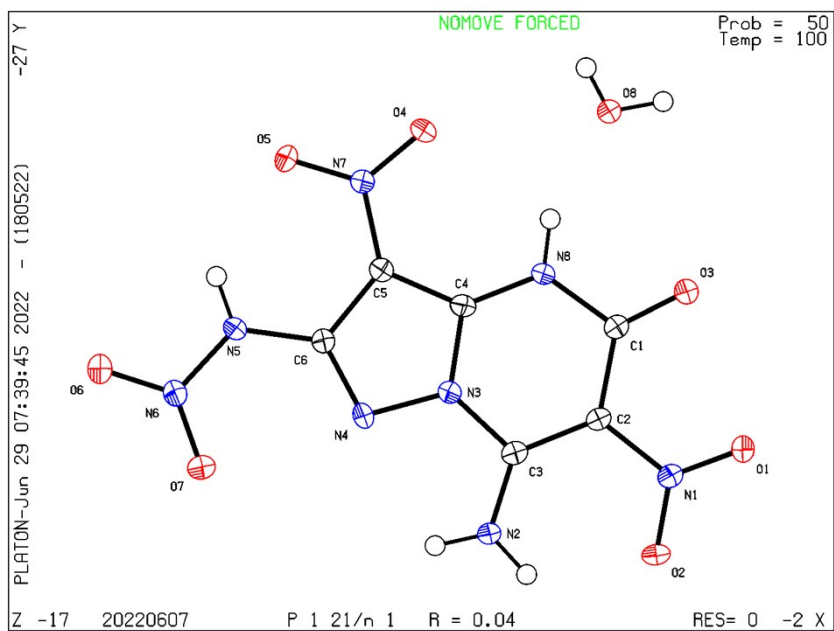

**Figure S5.** Single crystal of  $7 \cdot \text{H}_2\text{O}$  was obtained by slow evaporation of a solution of ethyl acetate for X-ray diffraction measurements.

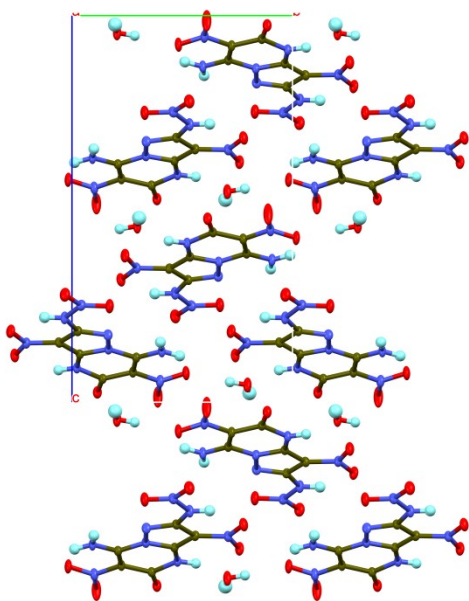

**Figure S6.** Unit cell view for  $7 \cdot \text{H}_2\text{O}$  along a axis.



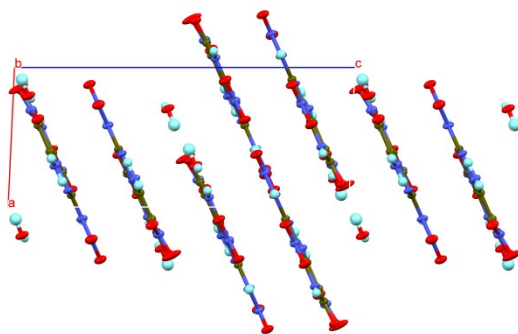

**Figure S7.** Unit cell view for  $7.H_2O$  along b axis.

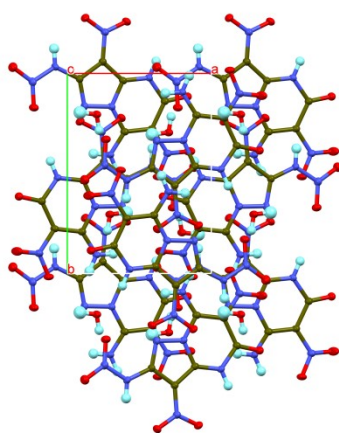

**Figure S8.** Unit cell view for  $7.H_2O$  along c axis.

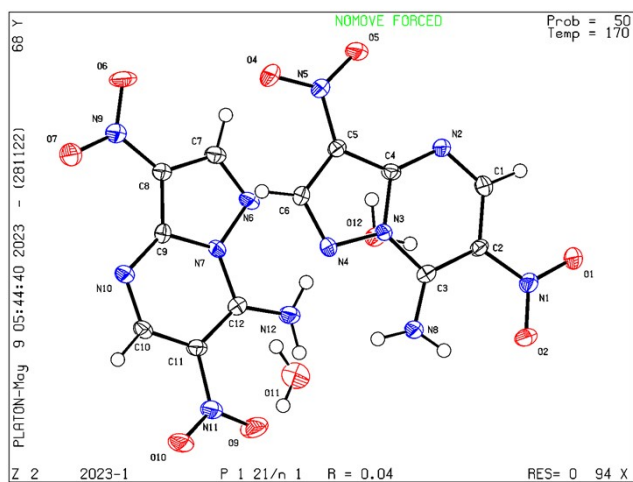

**Figure S9.** Single crystal of  $9.H_2O$  was obtained by slow evaporation of a solution of ethyl acetate for X-ray diffraction measurements.

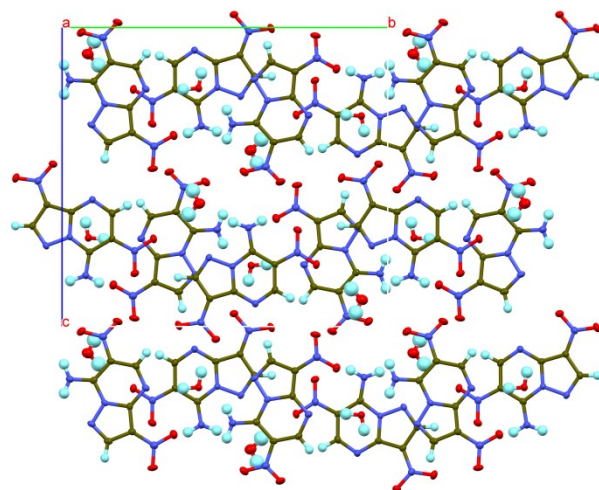

**Figure S10.** Unit cell view for **9.H<sub>2</sub>O** along a axis.

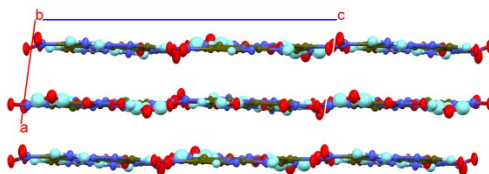

**Figure S11.** Unit cell view for **9.H<sub>2</sub>O** along b axis.

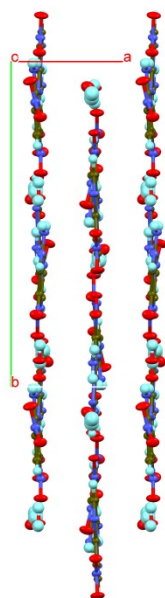

**Figure S12.** Unit cell view for **9.H<sub>2</sub>O** along c axis.

#### 4. 2D fingerprint plots for 4, 7 and 9

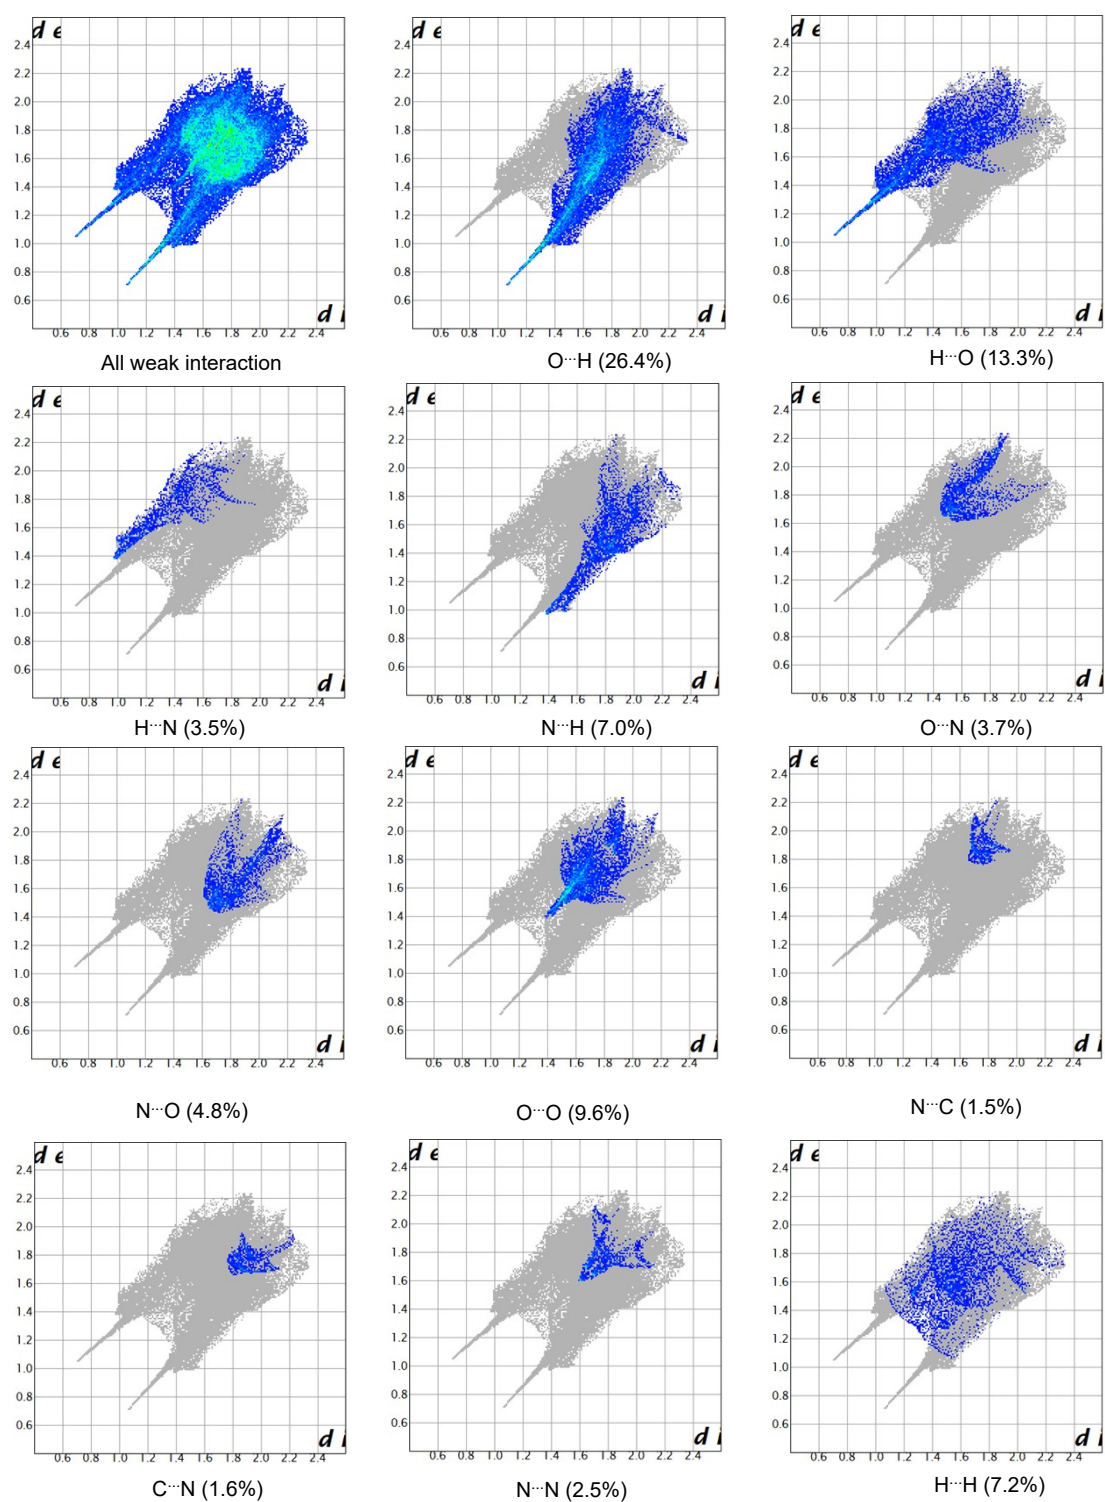

Figure S13. 2D fingerprint plots for 4

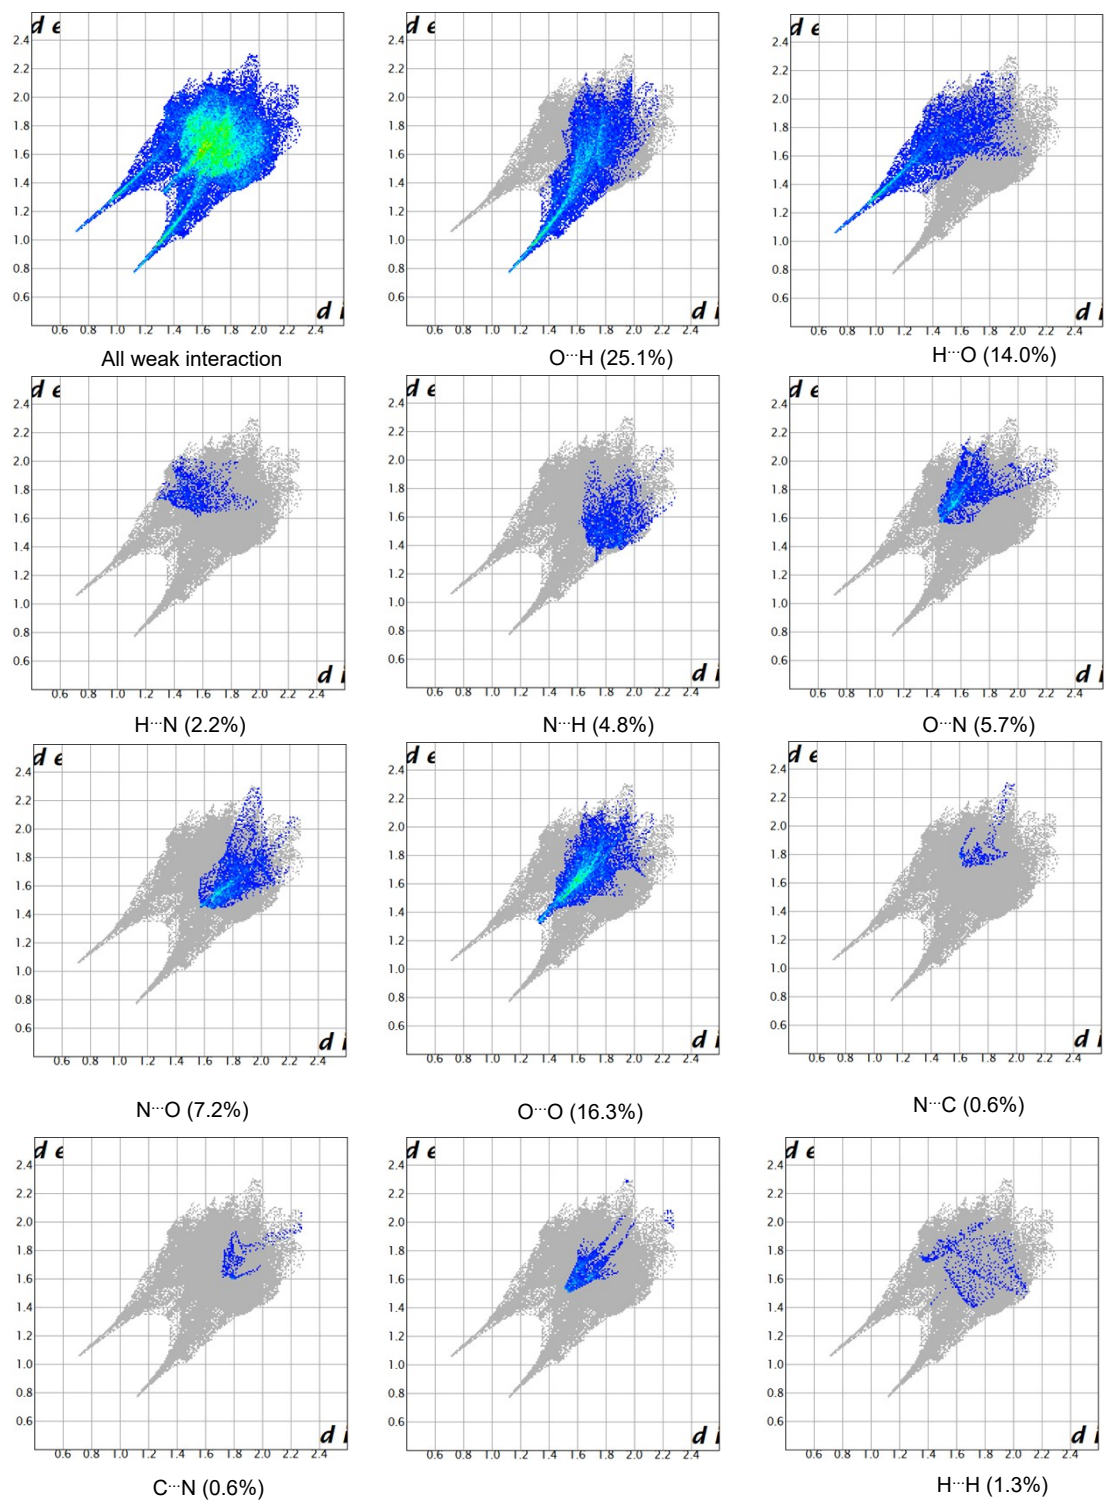

Figure S14. 2D fingerprint plots for 7

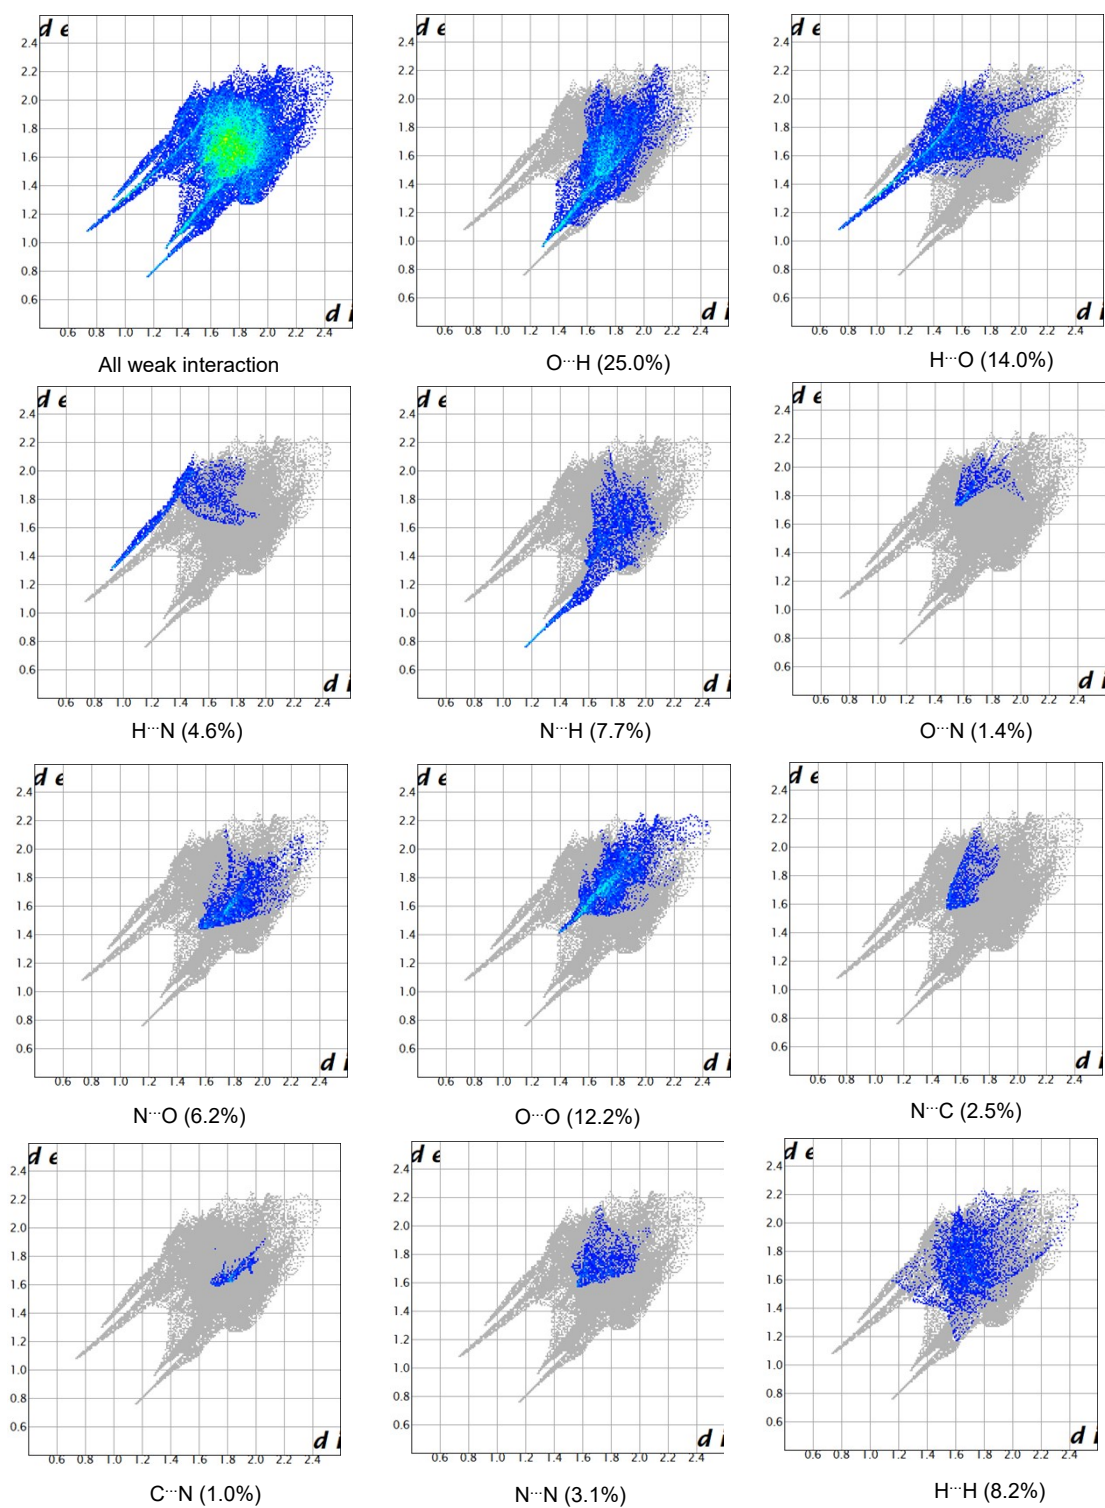

Figure S15. 2D fingerprint plots for 9

5.  $^1\text{H}$  NMR and  $^{13}\text{C}$  NMR of new compounds 3, 4, 6, 7 and 9.

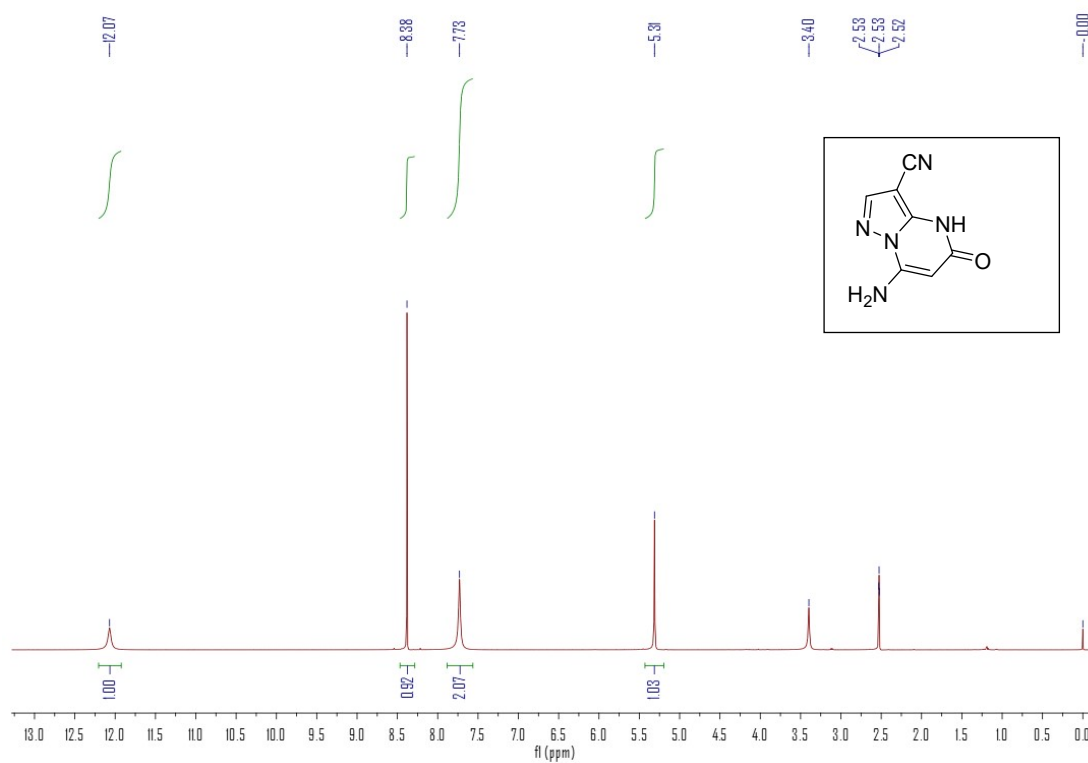

Figure S16.  $^1\text{H}$  NMR spectra in DMSO- $d_6$  for compound 3.

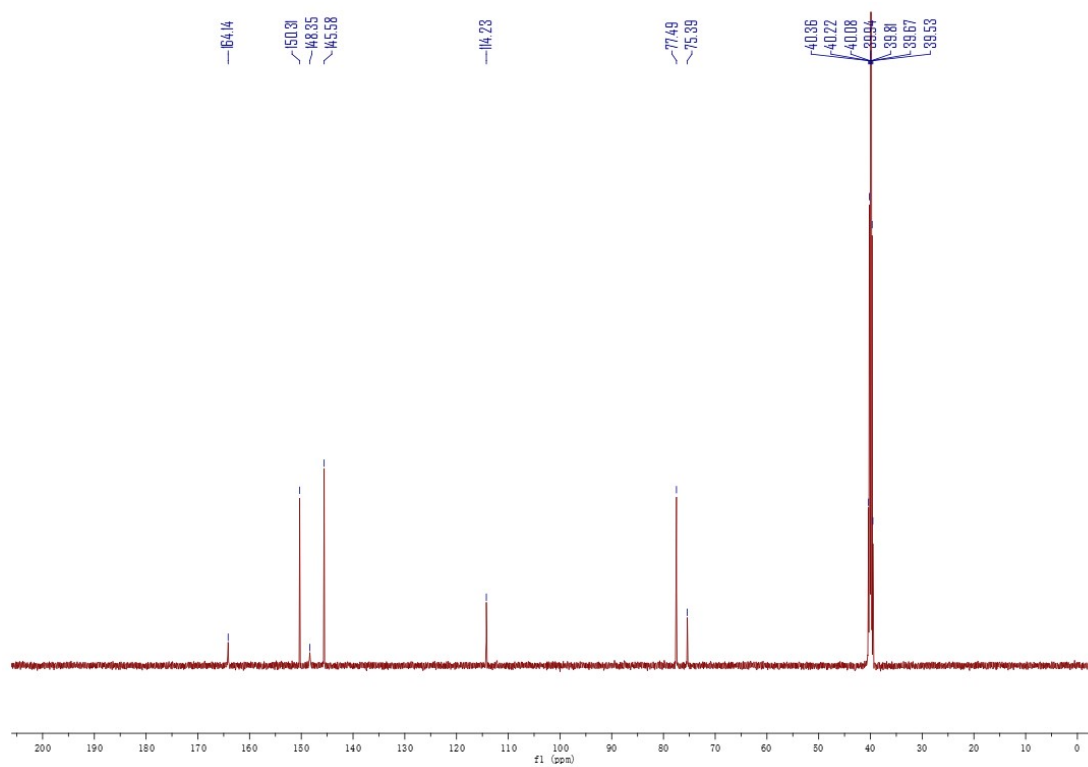

Figure S17.  $^{13}\text{C}$  NMR spectra in DMSO- $d_6$  for compound 3.

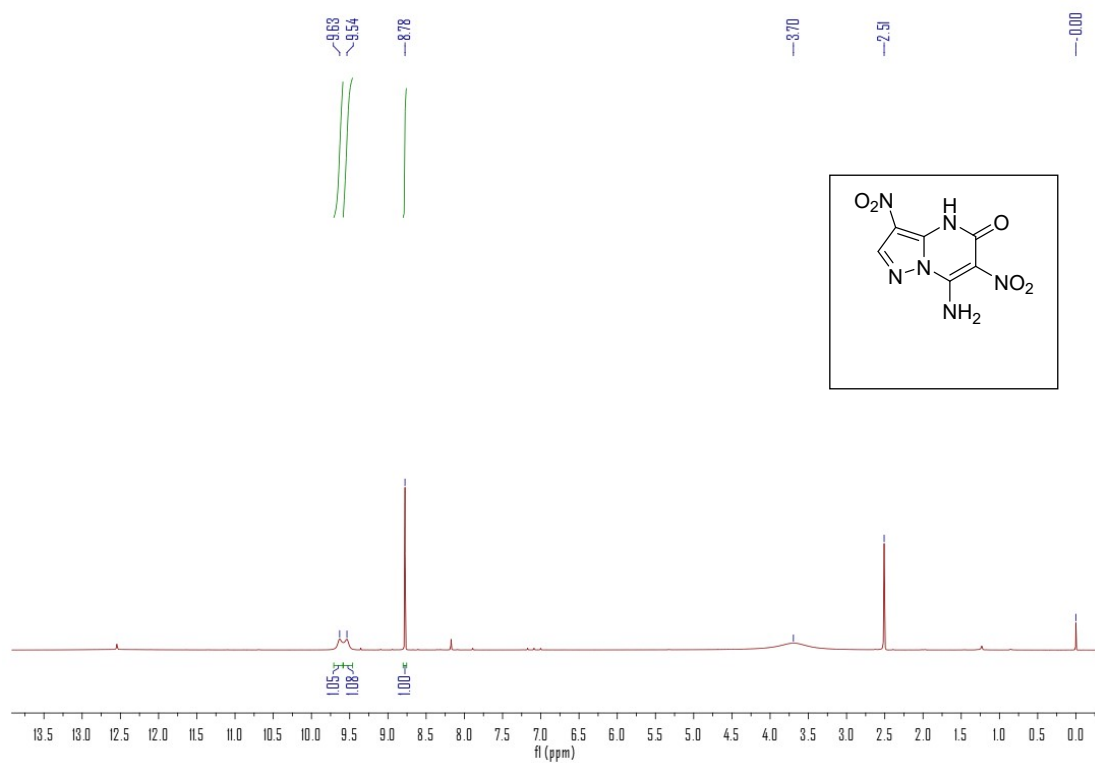

Figure S18.  $^1\text{H}$  NMR spectra in DMSO- $d_6$  for compound 4.

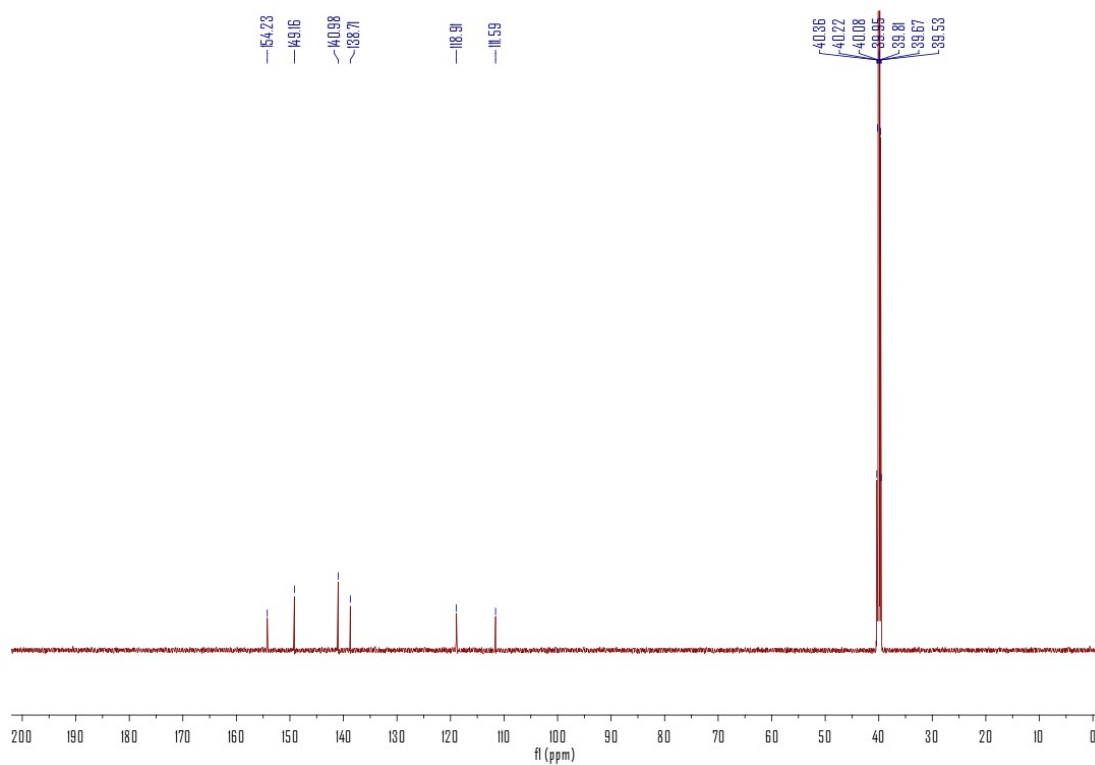

Figure S19.  $^{13}\text{C}$  NMR spectra in DMSO- $d_6$  for compound 4.

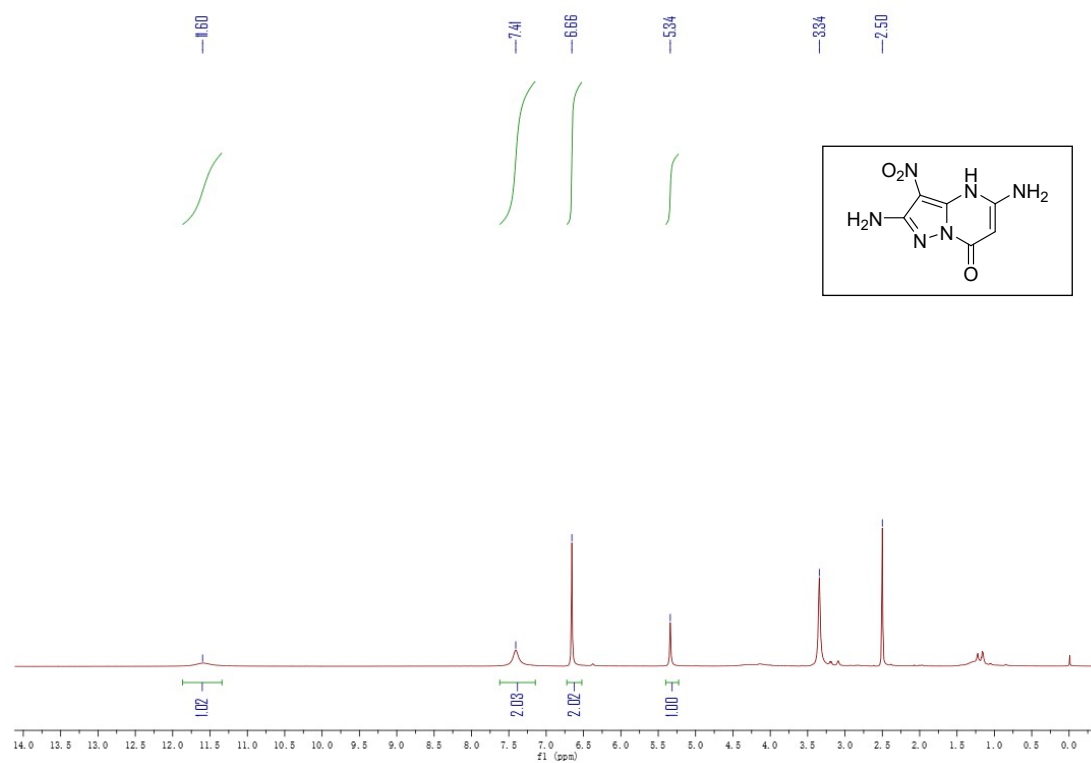

**Figure S20.**  $^1\text{H}$  NMR spectra in DMSO- $d_6$  for compound 6.

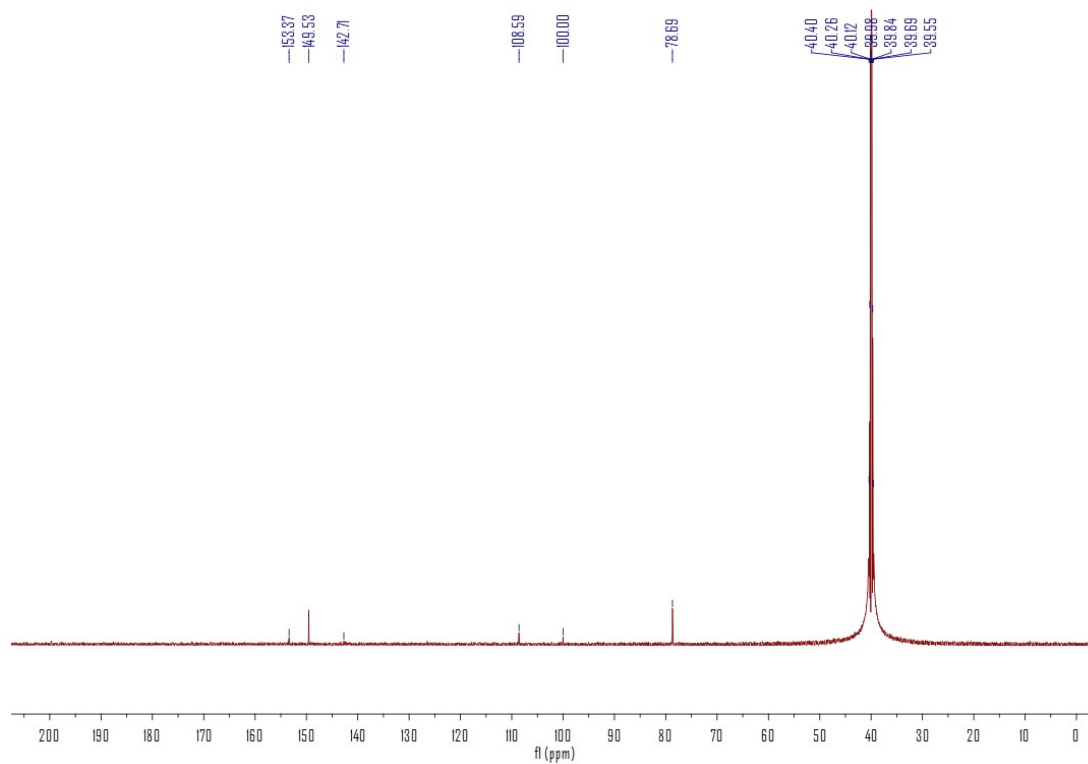

**Figure S21.**  $^{13}\text{C}$  NMR spectra in DMSO- $d_6$  for compound 6.



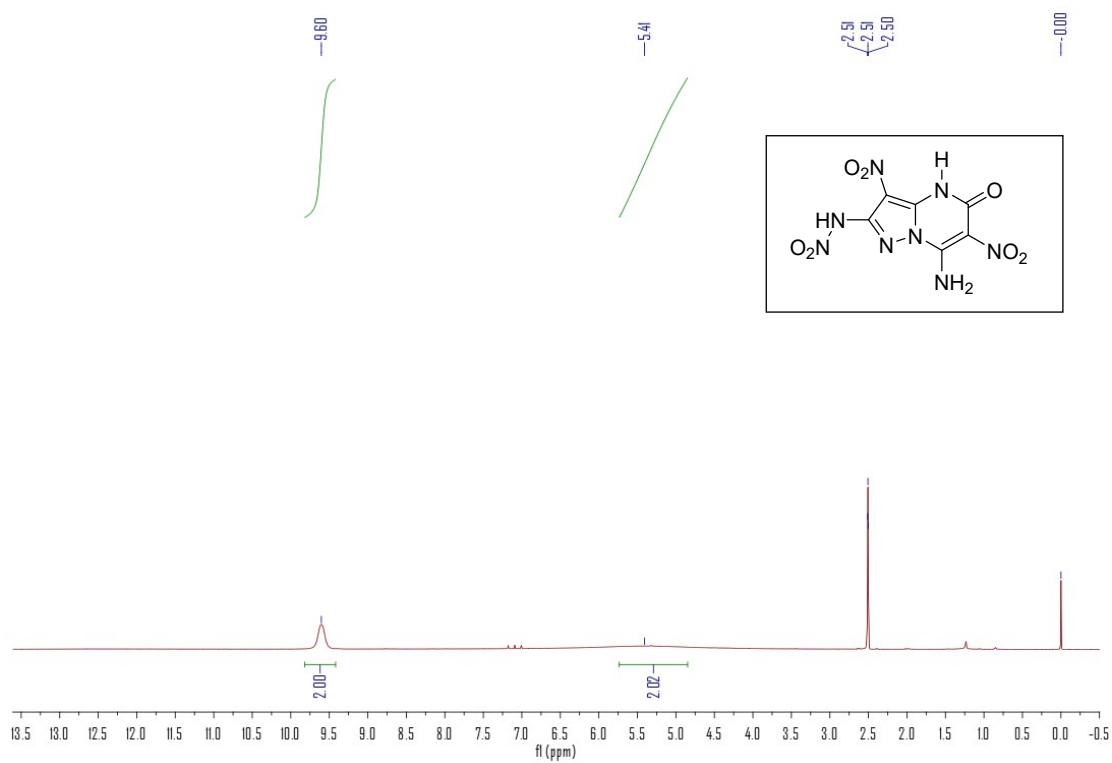

Figure S22. <sup>1</sup>H NMR spectra in DMSO-d<sub>6</sub> for compound 7.

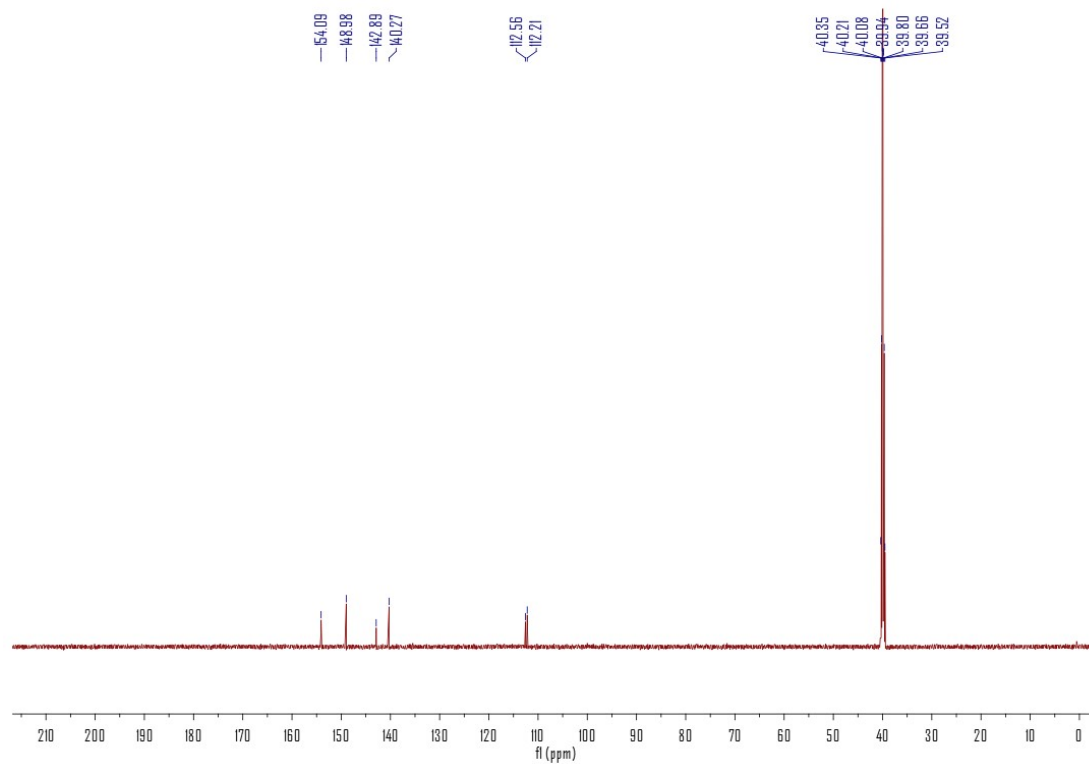

Figure S23. <sup>13</sup>C NMR spectra in DMSO-d<sub>6</sub> for compound 7.

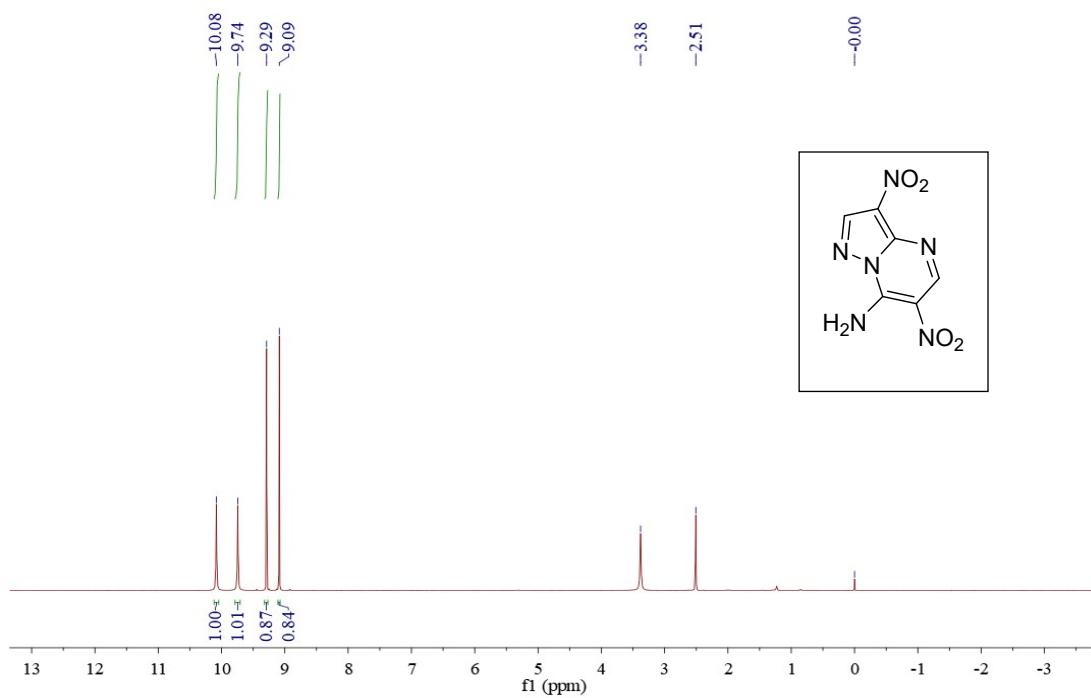

**Figure S24.**  $^1\text{H}$  NMR spectra in DMSO- $d_6$  for compound **9**.

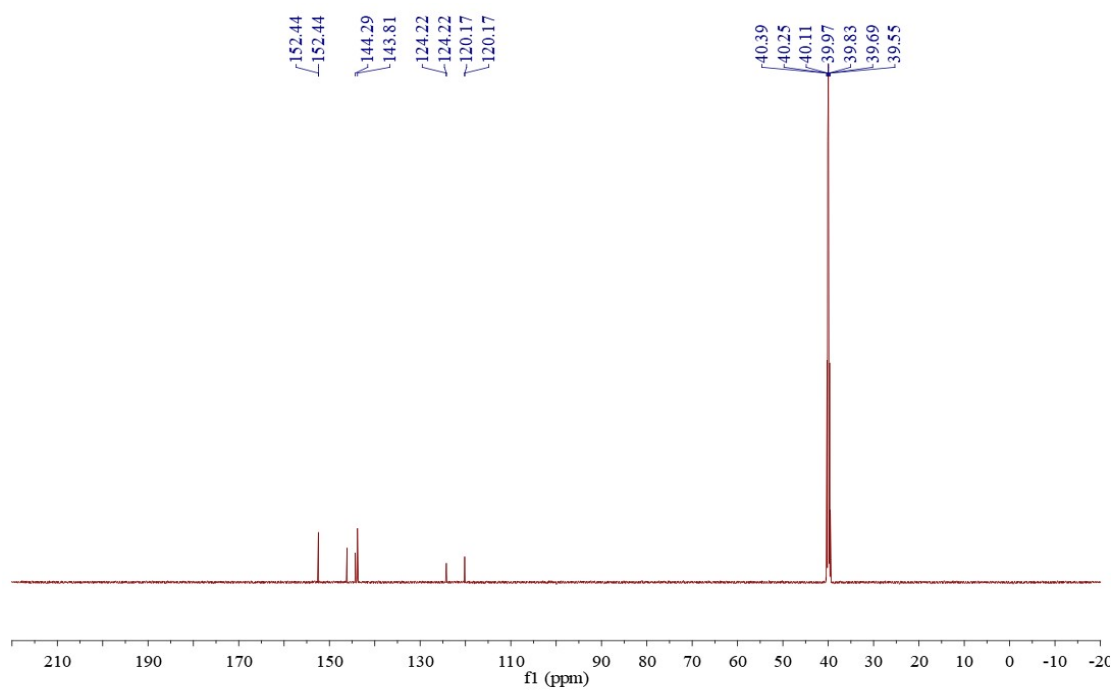

**Figure S25.**  $^{13}\text{C}$  NMR spectra in DMSO- $d_6$  for compound **9**.

## 6. DSC of new compounds 4, 7 and 9

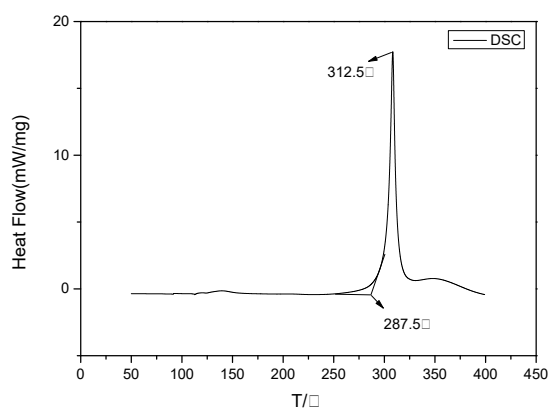

Figure S26. DSC of new compounds 4.

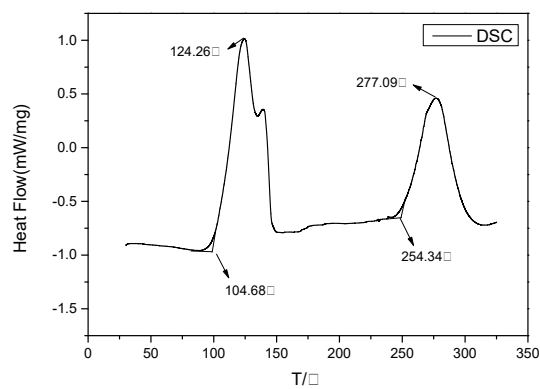

Figure S27. DSC of new compounds 7.

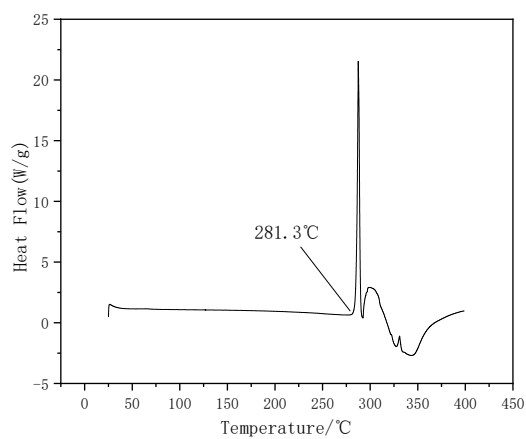

Figure S28. DSC of new compounds 9.

## 7. References

- (1) Westwell, M. S.; Searle, M. S.; Wales, D. J.; Williams, D. H. Empirical correlations between thermodynamic properties and intermolecular forces. *J. Am. Chem. Soc.* **1995**, *117*, 5013–5015.
- (2) Z. Zeng, Y. Liu, Q. Lv, W. Huang, H. Yang, G. Cheng, Y. Tang, From N atom to C–NO<sub>2</sub> group: Achieving a high energy density material with a “NH<sub>2</sub>–NO<sub>2</sub>–NH<sub>2</sub>” block. *Chem. Eng. J.* **2022**, *450*, 138094-138099.
- (3) D. A. Gazizov, E. B. Gorbunov, G. L. Rusinov, E.N. Ulomsky, V. N. Charushin, A new family of fused azolo[1,5-a]pteridines and azolo[5,1-b]purines, *ACS Omega* **2020**, *5*, 18226-18233.
